# Supplementary material for: 加温加湿器MR-850オートモードの留意点 (第19回福岡県臨床工学会発表) -- (循環・呼吸セッション)
Source: Springer Nature journal article supplement (doi:10.1007/s11136-021-03027-5), 2011-01-01
Supplement: MOESM1 [file 19828392]

## SUPPLEMENTARY MATERIAL

### TITLE OF ARTICLE

Longitudinal measurement invariance of the International Spinal Cord Injury Quality of Life Basic Data Set (SCI-QoL-BDS)

### JOURNAL

Quality of Life Research

### AUTHORS

Simon Kunz<sup>\*1,2</sup>, Valerie Carrard<sup>\*1,2,3</sup>, Mayra Galvis Aparicio<sup>1,2</sup>, Anke Scheel-Sailer<sup>2,4</sup>, Christine Fekete<sup>1,2</sup>, Peter Lude<sup>1,5,6</sup>, Marcel W. M. Post<sup>7,8</sup>, Maren Westphal<sup>9,10</sup>

\*Simon Kunz and Valerie Carrard contributed equally to the study and therefore share first authorship.

### Affiliations

1. Swiss Paraplegic Research (SPF), Nottwil, Switzerland.
2. University of Lucerne, Department of Health Sciences and Medicine, Lucerne, Switzerland.
3. Psychiatric Liaison Service, Lausanne University Hospital (CHUV) and University of Lausanne, Lausanne, Switzerland
4. Swiss Paraplegic Center, Nottwil, Switzerland
5. University Hospital Zurich, Department of Consultation-liaison Psychiatry and Psychosomatics, Zurich, Switzerland
6. Zurich University of Applied Sciences (ZHAW), School of Applied Psychology, Zurich, Switzerland
7. University of Groningen, Department of Rehabilitation Medicine, Groningen, the Netherlands
8. University Medical Center Utrecht and De Hoogstraat Rehabilitation, Center of Excellence in Rehabilitation Medicine, Brain Center Rudolf Magnus, Utrecht, the Netherlands
9. Pace University, Department of Psychology, Pleasantville, United States
10. Columbia University, Department of Psychiatry, New York, United States

### Corresponding author

Valerie Carrard

Current affiliation: Psychiatric Liaison Service, Lausanne University Hospital (CHUV) and University of Lausanne, Address: Avenue de Beaumont 23, 1011 Lausanne, Switzerland. Phone: +41 79 346 42 59

[valerie.carrard@chuv.ch](mailto:valerie.carrard@chuv.ch)

**Supplementary Table 1.** Comparison between participants and non-participants

| Variable                           | Participants ( <i>n</i> = 218) |           | Non-participants ( <i>n</i> = 1234) |           | <i>t</i> | <i>df</i> | <i>p</i> | <i>Cohen's d</i>  |
|------------------------------------|--------------------------------|-----------|-------------------------------------|-----------|----------|-----------|----------|-------------------|
|                                    | <i>M</i>                       | <i>SD</i> | <i>M</i>                            | <i>SD</i> |          |           |          |                   |
| Age                                | 51.8                           | 17.1      | 56.7                                | 18.4      | 3.61     | 1286      | > .001   | .27               |
| Time since SCI to discharge (days) | 193.7                          | 119.6     | 162.8                               | 186.4     | 2.35     | 1284      | .019     | .17               |
| SCIM at T1                         | 36.7                           | 19.3      | 38.5                                | 28.0      | 0.88     | 990       | .379     | .07               |
| Variable                           | <i>n</i>                       | %         | <i>n</i>                            | %         | $\chi^2$ | <i>df</i> | <i>p</i> | <i>Cramer's V</i> |
| Sex (Male)                         | 162                            | 74.3      | 707                                 | 66.1      | 5.60     | 1         | .018     | .07               |
| Traumatic cause of SCI             | 142                            | 65.1      | 579                                 | 54.2      | 8.85     | 1         | .003     | .08               |
| Level of SCI (paraplegia) at T1    | 135                            | 64.3      | 505                                 | 58.0      | 4.31     | 3         | .230     | .06               |
| Level of SCI (tetraplegia) at T1   | 72                             | 34.3      | 345                                 | 39.6      | -        | -         | -        | -                 |
| Level of SCI (intact) at T1        | 0                              | 0.00      | 8                                   | 0.9       | -        | -         | -        | -                 |
| Level of SCI (UTD) at T1           | 3                              | 1.4       | 16                                  | 1.5       | -        | -         | -        | -                 |
| AIS A at T1                        | 48                             | 23.0      | 196                                 | 22.8      | 3.47     | 6         | .748     | .06               |
| AIS B at T1                        | 28                             | 13.4      | 92                                  | 10.7      | -        | -         | -        | -                 |
| AIS C at T1                        | 29                             | 13.9      | 115                                 | 13.4      | -        | -         | -        | -                 |
| AIS D at T1                        | 103                            | 49.2      | 442                                 | 51.4      | -        | -         | -        | -                 |
| AIS E at T1                        | 0                              | 0.0       | 7                                   | 0.8       | -        | -         | -        | -                 |
| AIS UTD at T1                      | 1                              | 0.5       | 8                                   | 0.8       | -        | -         | -        | -                 |
| AIS unknown at T1                  | 0                              | 0.0       | 1                                   | 0.1       | -        | -         | -        | -                 |

*Note.* Only non-participants with available data could be included in the different comparison. Maybe this could be mentioned in the table note UTD = Unable to determine. SCIM = Spinal Cord Independence Measure III. AIS = American Spinal Injury Association Impairment Scale.

**Supplementary Table 2.** Parameter estimates of the partial intercept invariance model

|                                              | Standardized Coefficient | Standard Error | z-value | p-value |
|----------------------------------------------|--------------------------|----------------|---------|---------|
| Factor loadings                              |                          |                |         |         |
| Latent QoL factor at T1                      |                          |                |         |         |
| Satisfaction with life at T1                 | 0.84                     | 0.13           | 17.95   | <.001   |
| Satisfaction with physical health at T1      | 0.80                     | 0.12           | 18.06   | <.001   |
| Satisfaction with psychological health at T1 | 0.71                     | 0.12           | 14.69   | <.001   |
| Latent QoL factor at T2                      |                          |                |         |         |
| Satisfaction with life at T2                 | 0.95                     | 0.13           | 17.95   | <.001   |
| Satisfaction with physical health at T2      | 0.81                     | 0.12           | 18.06   | <.001   |
| Satisfaction with psychological health at T2 | 0.73                     | 0.12           | 14.69   | <.001   |
| Latent QoL factor at T4                      |                          |                |         |         |
| Satisfaction with life at T4                 | 0.95                     | 0.13           | 17.95   | <.001   |
| Satisfaction with physical health at T4      | 0.855                    | 0.12           | 18.06   | <.001   |
| Satisfaction with psychological health at T4 | 0.745                    | 0.12           | 14.69   | <.001   |
| Intercepts                                   |                          |                |         |         |
| Latent QoL factor at T1                      | 0.00                     | -              | -       | -       |
| Satisfaction with life at T1                 | 1.97                     | 0.18           | 29.40   | <.001   |
| Satisfaction with physical health at T1      | 1.62                     | 0.17           | 24.33   | <.001   |
| Satisfaction with psychological health at T1 | 2.43                     | 0.16           | 37.76   | <.001   |
| Latent QoL factor at T2                      | 0.15                     | 0.07           | 2.04    | .042    |
| Satisfaction with life at T2                 | 2.71                     | 0.18           | 29.40   | <.001   |
| Satisfaction with physical health at T2      | 1.88                     | 0.19           | 26.59   | <.001   |
| Satisfaction with psychological health at T2 | 2.45                     | 0.16           | 37.76   | <.001   |
| Latent QoL factor at T4                      | 0.51                     | 0.08           | 6.27    | <.001   |
| Satisfaction with life at T4                 | 2.33                     | 0.18           | 29.40   | <.001   |
| Satisfaction with physical health at T4      | 2.13                     | 0.19           | 26.59   | <.001   |
| Satisfaction with psychological health at T4 | 2.66                     | 0.16           | 37.76   | <.001   |
